# Supplementary material
Source: publisher figshare collection journal article supplement (https://acs.figshare.com/ndownloader/files/3716077)
Supplement: Supplementary file 1 [file 3716077]

# Reactivity Control of Rhodium Cluster Ions by Alloying with Tantalum Atoms

**Fumitaka Mafuné\*, Yuki Tawaraya, Satoshi Kudoh**

*Department of Basic Science, School of Arts and Sciences, The University of Tokyo,  
Komaba, Meguro, Tokyo 153-8902, Japan*

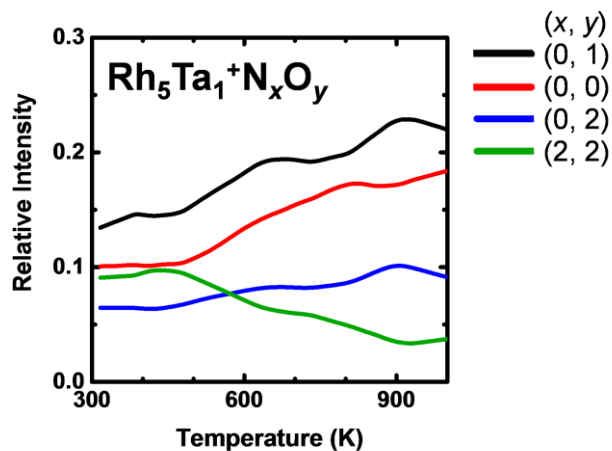

**Figure S1** TDS plots showing relative ion intensities of  $\text{Rh}_5\text{Ta}^+\text{N}_x\text{O}_y$  ( $x = 0$  and  $2$ ) and  $\text{Rh}_5\text{Ta}^+\text{O}_x$  ( $x = 1$  and  $2$ ) as a function of temperature.
